# Supplementary material for: Transcriptome Sequencing and Development of Genic SSR Markers of an Endangered Chinese Endemic Genus Dipteronia Oliver (Aceraceae)
Source: MDPI journal article supplement (doi:10.3390/molecules21030166), 2016-02-23
Supplement: s1 [file s1]

# Supplementary Materials: Transcriptome Sequencing and Development of Genic SSR Markers of an Endangered Chinese Endemic Genus *Dipteronia* Oliver (*Aceraceae*)

Tao Zhou, Zhong-Hu Li, Guo-Qing Bai, Li Feng, Chen Chen, Yue Wei, Yong-Xia Chang and Gui-Fang Zhao

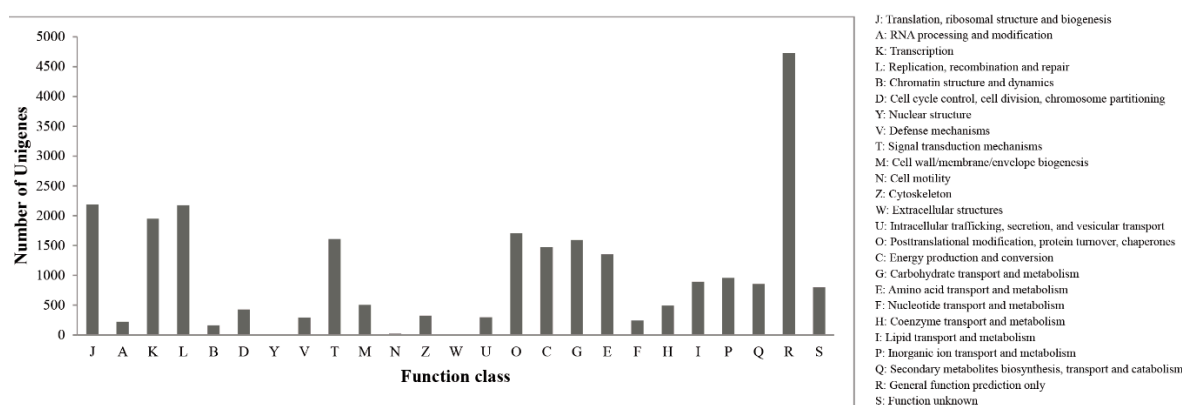

**Figure S1.** Clusters of orthologous groups (COG) classification of *Dipteronia* transcriptome. All the unigenes were aligned to COG database to predict and classify possible functions

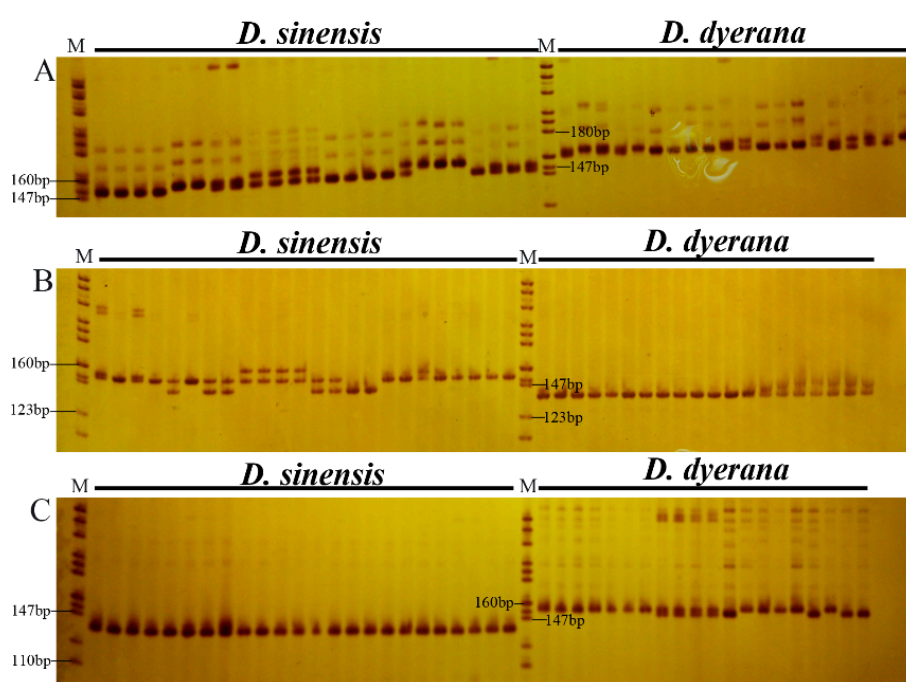

**Figure S2.** Polymorphism of primers among 44 individuals of *Dipteronia*. A. One of primers (DSSR2) which showed polymorphism in both *D. sinensis* and *D. dyeriana*. B. One of the primers (DSSR57) which showed a higher polymorphism in *D. sinensis*. C. One of the primers (DSSR86) which showed a higher polymorphism in *D. dyeriana*.

**Table S2.** Informativeness of genic-SSR loci following amplification from 44 individuals from different natural population of *Dipteronia*.

| Locus  | Na <sup>1</sup> | Ne <sup>2</sup> | Ho <sup>3</sup> | He <sup>4</sup> | I <sup>5</sup> | PIC <sup>6</sup> | HWE <sup>7</sup> |
|--------|-----------------|-----------------|-----------------|-----------------|----------------|------------------|------------------|
| DSSR1  | 5               | 3.7556          | 0.159           | 0.742           | 1.4640         | 0.697            | 0.025347 *       |
| DSSR2  | 6               | 4.3801          | 0.386           | 0.781           | 1.6175         | 0.738            | 0.500915         |
| DSSR3  | 2               | 1.5708          | 0.023           | 0.368           | 0.5495         | 0.297            | 0.025347 *       |
| DSSR4  | 5               | 2.8201          | 0.295           | 0.653           | 1.2123         | 0.579            | 0.709388         |
| DSSR5  | 6               | 3.8489          | 0.091           | 0.749           | 1.5172         | 0.702            | 0.025347 *       |
| DSSR6  | 11              | 8.6044          | 0.250           | 0.894           | 2.2365         | 0.872            | 0.025347 *       |
| DSSR7  | 6               | 4.3022          | 0.045           | 0.776           | 1.5568         | 0.730            | 0.164476         |
| DSSR8  | 13              | 6.5739          | 0.477           | 0.858           | 2.1365         | 0.831            | 0.124652         |
| DSSR9  | 7               | 3.7886          | 0.455           | 0.745           | 1.5739         | 0.704            | 0.410859         |
| DSSR10 | 11              | 4.3801          | 0.250           | 0.781           | 1.8329         | 0.749            | 0.57615          |
| DSSR11 | 6               | 4.7393          | 0.205           | 0.798           | 1.6529         | 0.757            | 0.025347 *       |
| DSSR12 | 5               | 4.7451          | 0.182           | 0.798           | 1.5841         | 0.756            | 0.654721         |
| DSSR13 | 7               | 5.5393          | 0.159           | 0.829           | 1.8072         | 0.795            | 0.025347 *       |
| DSSR14 | 5               | 3.2213          | 0.227           | 0.697           | 1.3007         | 0.638            | 0.025347 *       |
| DSSR15 | 4               | 2.0607          | 0.227           | 0.521           | 0.9272         | 0.459            | 0.289756         |
| DSSR16 | 6               | 4.0502          | 0.477           | 0.762           | 1.5508         | 0.715            | 0.427171         |
| DSSR17 | 3               | 2.4694          | 0.045           | 0.602           | 0.9949         | 0.526            | 0.57615          |
| DSSR18 | 7               | 2.9992          | 0.409           | 0.674           | 1.4037         | 0.632            | 0.504985         |
| DSSR19 | 3               | 2.0817          | 0.045           | 0.526           | 0.7835         | 0.406            | 0.504985         |
| DSSR20 | 3               | 2.1310          | 0.023           | 0.537           | 0.8165         | 0.422            | 0.350648         |
| DSSR21 | 4               | 2.8618          | 0.045           | 0.658           | 1.1143         | 0.581            | 0.775097         |
| DSSR22 | 3               | 2.3725          | 0.091           | 0.585           | 0.9348         | 0.486            | 0.504985         |
| DSSR23 | 4               | 2.3438          | 0.227           | 0.580           | 1.0451         | 0.517            | 0.803785         |
| DSSR24 | 6               | 3.3495          | 0.205           | 0.710           | 1.4080         | 0.659            | 0.025347 *       |
| DSSR25 | 3               | 2.3048          | 0.273           | 0.573           | 0.9576         | 0.504            | 0.046012 *       |
| DSSR26 | 7               | 3.2730          | 0.205           | 0.702           | 1.4447         | 0.650            | 0.775097         |
| DSSR27 | 4               | 2.8325          | 0.205           | 0.654           | 1.1278         | 0.578            | 0.230139         |
| DSSR28 | 6               | 3.1608          | 0.205           | 0.691           | 1.3498         | 0.634            | 0.230139         |
| DSSR29 | 8               | 3.2953          | 0.364           | 0.705           | 1.5281         | 0.664            | 0.532104         |
| DSSR30 | 4               | 2.9490          | 0.182           | 0.668           | 1.1698         | 0.597            | 0.442119         |
| DSSR31 | 2               | 1.3653          | 0.136           | 0.271           | 0.4382         | 0.232            | 0.0455 *         |
| DSSR32 | 3               | 2.3255          | 0.114           | 0.577           | 0.9156         | 0.475            | 0.350648         |
| DSSR33 | 3               | 2.1310          | 0.068           | 0.537           | 0.8165         | 0.422            | 0.230139         |
| DSSR34 | 4               | 2.8222          | 0.136           | 0.653           | 1.1301         | 0.580            | 0.0455 *         |
| DSSR35 | 3               | 2.0817          | 0.045           | 0.526           | 0.7835         | 0.406            | 0.504985         |
| DSSR36 | 6               | 1.9477          | 0.091           | 0.492           | 0.9898         | 0.454            | 0.2173           |
| DSSR37 | 4               | 2.4884          | 0.091           | 0.605           | 1.0250         | 0.514            | 0.930916         |
| DSSR38 | 3               | 2.3725          | 0.091           | 0.585           | 0.9348         | 0.486            | 0.230139         |
| DSSR39 | 3               | 2.8119          | 0.250           | 0.652           | 1.0666         | 0.572            | 0.0455 *         |
| DSSR40 | 3               | 2.3725          | 0.000           | 0.585           | 0.9348         | 0.486            |                  |
| DSSR41 | 11              | 3.0730          | 0.409           | 0.682           | 1.6632         | 0.657            | 0.261464         |
| DSSR42 | 5               | 3.2026          | 0.250           | 0.696           | 1.3331         | 0.645            | 0.230139         |
| DSSR43 | 5               | 2.9467          | 0.114           | 0.668           | 1.2303         | 0.600            | 0.57615          |
| DSSR44 | 4               | 1.7324          | 0.159           | 0.428           | 0.7935         | 0.388            | 1                |
| DSSR45 | 3               | 1.2621          | 0.136           | 0.210           | 0.4305         | 0.197            | 0.025347 *       |
| DSSR46 | 3               | 2.1802          | 0.091           | 0.548           | 0.8455         | 0.436            | 0.0455 *         |
| DSSR47 | 4               | 3.0156          | 0.227           | 0.676           | 1.2117         | 0.610            | 0.350648         |
| DSSR48 | 5               | 2.3283          | 0.250           | 0.577           | 0.9882         | 0.480            | 0.504985         |
| DSSR49 | 3               | 2.2317          | 0.091           | 0.558           | 0.8718         | 0.450            | 0.775097         |

Table S2. Cont.

| Locus  | Na <sup>1</sup> | Ne <sup>2</sup> | Ho <sup>3</sup> | He <sup>4</sup> | I <sup>5</sup> | PIC <sup>6</sup> | HWE <sup>7</sup> |
|--------|-----------------|-----------------|-----------------|-----------------|----------------|------------------|------------------|
| DSSR50 | 5               | 3.1100          | 0.023           | 0.686           | 1.2677         | 0.624            | 0.0455 *         |
| DSSR51 | 4               | 2.5061          | 0.023           | 0.608           | 1.0177         | 0.519            | 0.046012 *       |
| DSSR52 | 5               | 2.5357          | 0.068           | 0.613           | 1.1016         | 0.529            | 0.025347 *       |
| DSSR53 | 4               | 2.6502          | 0.205           | 0.630           | 1.0988         | 0.548            | 0.504985         |
| DSSR54 | 3               | 2.5676          | 0.136           | 0.618           | 1.0180         | 0.541            | 0.803785         |
| DSSR55 | 4               | 2.9602          | 0.182           | 0.670           | 1.1983         | 0.602            | 0.527585         |
| DSSR56 | 2               | 1.4824          | 0.227           | 0.329           | 0.5066         | 0.272            | 0.0455 *         |
| DSSR57 | 3               | 2.2151          | 0.045           | 0.555           | 0.8811         | 0.456            | 0.709388         |
| DSSR58 | 5               | 2.8681          | 0.091           | 0.659           | 1.2162         | 0.588            | 0.230139         |
| DSSR59 | 9               | 3.6876          | 0.295           | 0.737           | 1.6617         | 0.703            | 0.261464         |
| DSSR60 | 4               | 2.9157          | 0.136           | 0.665           | 1.1732         | 0.593            | 0.504985         |
| DSSR61 | 7               | 3.3670          | 0.227           | 0.711           | 1.4636         | 0.662            | 0.504985         |
| DSSR62 | 3               | 2.6575          | 0.114           | 0.631           | 1.0278         | 0.545            | 0.775097         |
| DSSR63 | 3               | 2.1802          | 0.091           | 0.548           | 0.8455         | 0.436            | 0.0455 *         |
| DSSR64 | 4               | 2.3960          | 0.136           | 0.589           | 0.9978         | 0.494            | 1                |
| DSSR65 | 2               | 1.0465          | 0.045           | 0.045           | 0.1085         | 0.043            | 0.504985         |
| DSSR66 | 2               | 2.0000          | 0.091           | 0.506           | 0.6931         | 0.375            | 0.0455 *         |
| DSSR67 | 4               | 2.9762          | 0.341           | 0.672           | 1.2223         | 0.612            | 0.0455 *         |
| DSSR68 | 6               | 3.0345          | 0.227           | 0.678           | 1.2781         | 0.614            | 0.230139         |
| DSSR69 | 8               | 3.8073          | 0.114           | 0.746           | 1.6641         | 0.712            | 0.046012 *       |
| DSSR70 | 4               | 2.0930          | 0.068           | 0.528           | 0.8500         | 0.427            | 0.775097         |
| DSSR71 | 2               | 1.9197          | 0.159           | 0.485           | 0.6721         | 0.364            | 0.775097         |
| DSSR72 | 8               | 3.5328          | 0.341           | 0.725           | 1.5733         | 0.683            | 0.261464         |
| DSSR73 | 2               | 1.0950          | 0.000           | 0.088           | 0.1849         | 0.083            | 0.025347 *       |
| DSSR74 | 3               | 2.5865          | 0.159           | 0.620           | 1.0076         | 0.532            | 0.504985         |
| DSSR75 | 4               | 2.2291          | 0.205           | 0.558           | 0.8986         | 0.451            | 0.0455 *         |
| DSSR76 | 3               | 2.0817          | 0.045           | 0.526           | 0.7835         | 0.406            | 0.504985         |
| DSSR77 | 3               | 1.4556          | 0.182           | 0.317           | 0.5944         | 0.289            | 0.230139         |
| DSSR78 | 3               | 2.8119          | 0.250           | 0.652           | 1.0666         | 0.572            | 0.0455 *         |
| DSSR79 | 3               | 2.2776          | 0.136           | 0.567           | 0.8945         | 0.463            | 0.775097         |
| DSSR80 | 8               | 3.5490          | 0.205           | 0.726           | 1.5777         | 0.684            | 0.261464         |
| DSSR81 | 3               | 2.3960          | 0.091           | 0.589           | 0.9667         | 0.508            | 0.025347 *       |
| DSSR82 | 4               | 2.3424          | 0.068           | 0.580           | 0.9699         | 0.481            | 0.775097         |
| DSSR83 | 3               | 2.1032          | 0.023           | 0.531           | 0.8101         | 0.418            | 0.241489         |
| DSSR84 | 3               | 2.0325          | 0.023           | 0.514           | 0.7442         | 0.390            | 0.775097         |
| DSSR85 | 2               | 1.9959          | 0.045           | 0.505           | 0.6921         | 0.374            | 0.504985         |
| DSSR86 | 5               | 4.3214          | 0.273           | 0.777           | 1.5275         | 0.731            | 0.025347 *       |
| DSSR87 | 5               | 2.7191          | 0.341           | 0.639           | 1.2196         | 0.583            | 0.230139         |
| DSSR88 | 4               | 2.4368          | 0.182           | 0.596           | 1.0157         | 0.519            | 0.484395         |
| DSSR89 | 3               | 2.6233          | 0.136           | 0.626           | 1.0183         | 0.539            | 0.504985         |

Table S2. Cont.

| Locus  | Na <sup>1</sup> | Ne <sup>2</sup> | Ho <sup>3</sup> | He <sup>4</sup> | I <sup>5</sup> | PIC <sup>6</sup> | HWE <sup>7</sup> |
|--------|-----------------|-----------------|-----------------|-----------------|----------------|------------------|------------------|
| DSSR90 | 4               | 2.0930          | 0.091           | 0.528           | 0.8500         | 0.427            | 0.504985         |
| DSSR91 | 5               | 3.4602          | 0.250           | 0.719           | 1.4133         | 0.672            | 0.350648         |
| DSSR92 | 2               | 1.1200          | 0.068           | 0.108           | 0.2181         | 0.101            | 0.241489         |
| DSSR93 | 3               | 2.4805          | 0.205           | 0.604           | 0.9989         | 0.529            | 0.803785         |
| DSSR94 | 4               | 3.1051          | 0.023           | 0.686           | 1.2455         | 0.624            | 0.350648         |
| DSSR95 | 3               | 2.4383          | 0.182           | 0.597           | 0.9833         | 0.518            | 0.654721         |
| DSSR96 | 3               | 2.1032          | 0.023           | 0.531           | 0.8101         | 0.418            | 0.241489         |
| DSSR97 | 4               | 2.4444          | 0.000           | 0.598           | 1.1105         | 0.547            | 0.025347 *       |

<sup>1</sup> number of alleles; <sup>2</sup> The number of effective number of alleles; <sup>3</sup> observed heterozygosity; <sup>4</sup> expected heterozygosity; <sup>5</sup> Shannon's Information Index; <sup>6</sup> Polymorphism information content; <sup>7</sup> Hardy-Weinberg equilibrium, the probabilities of deviation from Hardy-Weinberg equilibrium (HWE) are indicated by asterisks (\*  $p < 0.05$ ).

Table S3. Informativeness of genic-SSR loci following amplification from 24 individuals from different natural population of *D. sinensis*.

| Locus  | Na <sup>1</sup> | Ne <sup>2</sup> | Ho <sup>3</sup> | He <sup>4</sup> | I <sup>5</sup> | PIC <sup>6</sup> | HWE <sup>7</sup> |
|--------|-----------------|-----------------|-----------------|-----------------|----------------|------------------|------------------|
| DSSR1  | 2               | 1.6000          | 0.000           | 0.383           | 0.5623         | 0.305            | 0.046 *          |
| DSSR2  | 3               | 2.2456          | 0.375           | 0.566           | 0.9407         | 0.493            | 0.505            |
| DSSR3  | 2               | 1.6528          | 0.042           | 0.403           | 0.5841         | 0.317            | 0.351            |
| DSSR4  | 3               | 1.6067          | 0.458           | 0.386           | 0.6885         | 0.344            | 0.505            |
| DSSR5  | 3               | 1.7534          | 0.042           | 0.439           | 0.7645         | 0.388            | 0.046 *          |
| DSSR6  | 7               | 5.1892          | 0.458           | 0.824           | 1.7492         | 0.780            | 0.558            |
| DSSR7  | 2               | 1.9459          | 0.000           | 0.496           | 0.6792         | 0.368            | 0.046 *          |
| DSSR8  | 6               | 3.3103          | 0.583           | 0.713           | 1.4440         | 0.661            | 0.285            |
| DSSR9  | 2               | 1.4922          | 0.417           | 0.337           | 0.5117         | 0.275            | 0.230            |
| DSSR10 | 8               | 4.9655          | 0.292           | 0.816           | 1.7686         | 0.771            | 0.172            |
| DSSR11 | 6               | 4.2198          | 0.375           | 0.779           | 1.5933         | 0.730            | 0.172            |
| DSSR12 | 3               | 2.9463          | 0.208           | 0.675           | 1.0897         | 0.587            | 0.046 *          |
| DSSR13 | 4               | 2.9691          | 0.167           | 0.677           | 1.1996         | 0.600            | 0.505            |
| DSSR14 | 5               | 4.0280          | 0.208           | 0.768           | 1.4422         | 0.708            | 0.775            |
| DSSR15 | 4               | 1.4750          | 0.167           | 0.329           | 0.6417         | 0.298            | 0.775            |
| DSSR16 | 5               | 2.9018          | 0.417           | 0.669           | 1.2423         | 0.593            | 0.261            |
| DSSR17 | 1               | 1.0000          | 0.000           | 0.000           | 0.0000         | 0.000            |                  |
| DSSR18 | 7               | 4.5896          | 0.750           | 0.799           | 1.6813         | 0.752            | 0.505            |
| DSSR19 | 2               | 1.0868          | 0.083           | 0.082           | 0.1732         | 0.077            | 0.505            |
| DSSR20 | 2               | 1.1327          | 0.042           | 0.120           | 0.2338         | 0.110            | 0.351            |
| DSSR21 | 3               | 2.0832          | 0.083           | 0.531           | 0.7797         | 0.405            | 0.775            |
| DSSR22 | 2               | 1.3846          | 0.167           | 0.284           | 0.4506         | 0.239            | 0.505            |
| DSSR23 | 4               | 3.1736          | 0.375           | 0.699           | 1.2493         | 0.630            | 0.931            |
| DSSR24 | 6               | 3.2727          | 0.375           | 0.709           | 1.3702         | 0.645            | 0.230            |
| DSSR25 | 3               | 2.8800          | 0.500           | 0.667           | 1.0776         | 0.579            | 0.046            |
| DSSR26 | 6               | 3.0078          | 0.375           | 0.682           | 1.3855         | 0.632            | 0.775            |
| DSSR27 | 3               | 2.0317          | 0.375           | 0.519           | 0.8045         | 0.415            | 0.230            |
| DSSR28 | 5               | 2.7106          | 0.375           | 0.645           | 1.2115         | 0.584            | 0.230            |
| DSSR29 | 8               | 4.5176          | 0.667           | 0.795           | 1.7651         | 0.755            | 0.532            |
| DSSR30 | 3               | 1.4049          | 0.167           | 0.294           | 0.5443         | 0.264            | 0.505            |
| DSSR31 | 2               | 1.7041          | 0.250           | 0.422           | 0.6036         | 0.328            | 0.046 *          |
| DSSR32 | 2               | 1.3318          | 0.208           | 0.254           | 0.4154         | 0.218            | 0.351            |
| DSSR33 | 2               | 1.1327          | 0.125           | 0.120           | 0.2338         | 0.110            | 0.230            |
| DSSR34 | 4               | 2.3415          | 0.250           | 0.585           | 0.9762         | 0.483            | 0.046 *          |

Table S3. Cont.

| Locus  | Na <sup>1</sup> | Ne <sup>2</sup> | Ho <sup>3</sup> | He <sup>4</sup> | I <sup>5</sup> | PIC <sup>6</sup> | HWE <sup>7</sup> |
|--------|-----------------|-----------------|-----------------|-----------------|----------------|------------------|------------------|
| DSSR35 | 2               | 1.0868          | 0.083           | 0.082           | 0.1732         | 0.077            | 0.505            |
| DSSR36 | 6               | 3.3103          | 0.167           | 0.713           | 1.3696         | 0.649            | 0.217            |
| DSSR37 | 3               | 1.5238          | 0.167           | 0.351           | 0.6160         | 0.307            | 0.931            |
| DSSR38 | 2               | 1.3846          | 0.167           | 0.284           | 0.4506         | 0.239            | 0.230            |
| DSSR39 | 2               | 1.9965          | 0.458           | 0.510           | 0.6923         | 0.375            | 0.046 *          |
| DSSR40 | 2               | 1.3846          | 0.000           | 0.284           | 0.4506         | 0.239            |                  |
| DSSR41 | 1               | 8.2286          | 0.750           | 0.897           | 2.2366         | 0.867            | 0.261            |
| DSSR42 | 5               | 3.5015          | 0.458           | 0.730           | 1.3483         | 0.660            | 0.230            |
| DSSR43 | 3               | 1.4527          | 0.083           | 0.318           | 0.5480         | 0.274            | 0.775            |
| DSSR44 | 4               | 2.6483          | 0.292           | 0.636           | 1.0938         | 0.559            | 1.000            |
| DSSR45 | 3               | 1.2915          | 0.250           | 0.230           | 0.4563         | 0.212            | 0.505            |
| DSSR46 | 2               | 1.1803          | 0.167           | 0.156           | 0.2868         | 0.141            | 0.046            |
| DSSR47 | 3               | 2.3802          | 0.417           | 0.592           | 0.9582         | 0.502            | 0.351            |
| DSSR48 | 5               | 1.6387          | 0.458           | 0.398           | 0.8279         | 0.371            | 0.505            |
| DSSR49 | 3               | 1.2872          | 0.167           | 0.228           | 0.4331         | 0.206            | 0.775            |
| DSSR50 | 4               | 2.5888          | 0.042           | 0.627           | 1.0609         | 0.537            | 0.046            |
| DSSR51 | 4               | 1.7323          | 0.042           | 0.432           | 0.7702         | 0.374            | 0.046            |
| DSSR52 | 3               | 1.2374          | 0.125           | 0.196           | 0.4042         | 0.183            | 0.775            |
| DSSR53 | 3               | 1.7428          | 0.375           | 0.435           | 0.7513         | 0.381            | 0.505            |
| DSSR54 | 2               | 1.0868          | 0.000           | 0.082           | 0.1732         | 0.077            | 0.046            |
| DSSR55 | 3               | 2.2677          | 0.333           | 0.571           | 0.9337         | 0.488            | 0.528            |
| DSSR56 | 2               | 1.8824          | 0.417           | 0.479           | 0.6616         | 0.359            | 0.046            |
| DSSR57 | 1               | 1.0000          | 0.000           | 0.000           | 0.0000         | 0.000            |                  |
| DSSR58 | 4               | 2.0945          | 0.167           | 0.534           | 0.9666         | 0.471            | 0.230            |
| DSSR59 | 9               | 5.4857          | 0.542           | 0.835           | 1.8811         | 0.794            | 0.261            |
| DSSR60 | 3               | 2.1818          | 0.250           | 0.553           | 0.8877         | 0.460            | 0.505            |
| DSSR61 | 6               | 3.2914          | 0.417           | 0.711           | 1.4202         | 0.659            | 0.505            |
| DSSR62 | 2               | 1.7534          | 0.208           | 0.439           | 0.6211         | 0.337            | 0.775            |
| DSSR63 | 2               | 1.1803          | 0.167           | 0.156           | 0.2868         | 0.141            | 0.046            |
| DSSR64 | 3               | 1.4118          | 0.250           | 0.298           | 0.5661         | 0.272            | 1.000            |
| DSSR65 | 2               | 1.0868          | 0.083           | 0.082           | 0.1732         | 0.077            | 0.505            |
| DSSR66 | 2               | 1.1803          | 0.167           | 0.156           | 0.2868         | 0.141            | 0.046            |
| DSSR67 | 4               | 3.0236          | 0.625           | 0.684           | 1.2043         | 0.607            | 0.046            |
| DSSR68 | 5               | 2.4202          | 0.417           | 0.599           | 1.0799         | 0.524            | 0.230            |
| DSSR69 | 8               | 5.8477          | 0.208           | 0.847           | 1.9003         | 0.808            | 0.046            |
| DSSR70 | 4               | 1.8885          | 0.125           | 0.480           | 0.8492         | 0.416            | 0.775            |
| DSSR71 | 2               | 1.6528          | 0.292           | 0.403           | 0.5841         | 0.317            | 0.775            |
| DSSR72 | 7               | 3.8919          | 0.625           | 0.759           | 1.6213         | 0.715            | 0.261            |
| DSSR73 | 1               | 1.0000          | 0.000           | 0.000           | 0.0000         | 0.000            |                  |
| DSSR74 | 2               | 1.6528          | 0.292           | 0.403           | 0.5841         | 0.317            | 0.505            |
| DSSR75 | 4               | 1.4826          | 0.375           | 0.332           | 0.6635         | 0.307            | 0.046            |
| DSSR76 | 2               | 1.0868          | 0.083           | 0.082           | 0.1732         | 0.077            | 0.505            |
| DSSR77 | 3               | 1.9862          | 0.333           | 0.507           | 0.8570         | 0.443            | 0.230            |
| DSSR78 | 2               | 1.9965          | 0.458           | 0.510           | 0.6923         | 0.375            | 0.046            |
| DSSR79 | 2               | 1.2800          | 0.250           | 0.223           | 0.3768         | 0.195            | 0.775            |
| DSSR80 | 7               | 3.9588          | 0.375           | 0.763           | 1.6293         | 0.717            | 0.261            |
| DSSR81 | 1               | 1.0000          | 0.000           | 0.000           | 0.0000         | 0.000            |                  |
| DSSR82 | 3               | 1.3505          | 0.125           | 0.265           | 0.5150         | 0.244            | 0.775            |
| DSSR83 | 1               | 1.0000          | 0.000           | 0.000           | 0.0000         | 0.000            |                  |
| DSSR84 | 2               | 1.0425          | 0.042           | 0.042           | 0.1013         | 0.040            | 0.775            |

Table S3. Cont.

| Locus  | Na <sup>1</sup> | Ne <sup>2</sup> | Ho <sup>3</sup> | He <sup>4</sup> | I <sup>5</sup> | PIC <sup>6</sup> | HWE <sup>7</sup> |
|--------|-----------------|-----------------|-----------------|-----------------|----------------|------------------|------------------|
| DSSR85 | 2               | 1.0868          | 0.083           | 0.082           | 0.1732         | 0.077            | 0.505            |
| DSSR86 | 3               | 2.6667          | 0.500           | 0.638           | 1.0282         | 0.545            | 0.230            |
| DSSR87 | 5               | 3.3488          | 0.625           | 0.716           | 1.3849         | 0.660            | 0.230            |
| DSSR88 | 1               | 1.0000          | 0.000           | 0.000           | 0.0000         | 0.000            |                  |
| DSSR89 | 2               | 1.7041          | 0.250           | 0.422           | 0.6036         | 0.328            | 0.505            |
| DSSR90 | 4               | 1.8885          | 0.167           | 0.480           | 0.8492         | 0.416            | 0.505            |
| DSSR91 | 4               | 3.6113          | 0.458           | 0.738           | 1.3279         | 0.672            | 0.351            |
| DSSR92 | 1               | 1.0000          | 0.000           | 0.000           | 0.0000         | 0.000            |                  |
| DSSR93 | 1               | 1.0000          | 0.000           | 0.000           | 0.0000         | 0.000            |                  |
| DSSR94 | 3               | 2.5772          | 0.042           | 0.625           | 1.0203         | 0.542            | 0.351            |
| DSSR95 | 1               | 1.0000          | 0.000           | 0.000           | 0.0000         | 0.000            |                  |
| DSSR96 | 1               | 1.0000          | 0.000           | 0.000           | 0.0000         | 0.000            |                  |
| DSSR97 | 3               | 2.5714          | 0.000           | 0.624           | 1.0114         | 0.535            |                  |

<sup>1</sup> number of alleles; <sup>2</sup> The number of effective number of alleles; <sup>3</sup> observed heterozygosity; <sup>4</sup> expected heterozygosity; <sup>5</sup> Shannon's Information Index, <sup>6</sup> Polymorphism information content; <sup>7</sup> Hardy–Weinberg equilibrium, the probabilities of deviation from Hardy–Weinberg equilibrium (HWE) are indicated by asterisks (\*  $p < 0.05$ ).

**Table S4.** Informativeness of genic-SSR loci following amplification from 20 individuals from different natural population of *D. dyerana*.

| Locus  | Na <sup>1</sup> | Ne <sup>2</sup> | Ho <sup>3</sup> | He <sup>4</sup> | I <sup>5</sup> | PIC <sup>6</sup> | HWE <sup>7</sup> |
|--------|-----------------|-----------------|-----------------|-----------------|----------------|------------------|------------------|
| DSSR1  | 4               | 2.9091          | 0.350           | 0.673           | 1.1452         | 0.587            | 0.025 *          |
| DSSR2  | 3               | 2.1563          | 0.400           | 0.550           | 0.9139         | 0.477            | 0.501            |
| DSSR3  | 2               | 1.4706          | 0.000           | 0.328           | 0.5004         | 0.269            | 0.025 *          |
| DSSR4  | 2               | 1.2195          | 0.100           | 0.185           | 0.3251         | 0.164            | 0.709            |
| DSSR5  | 3               | 2.2923          | 0.150           | 0.578           | 0.9045         | 0.469            | 0.025 *          |
| DSSR6  | 4               | 3.5088          | 0.000           | 0.733           | 1.3055         | 0.661            | 0.025 *          |
| DSSR7  | 4               | 2.5974          | 0.100           | 0.631           | 1.0941         | 0.544            | 0.164            |
| DSSR8  | 7               | 3.3195          | 0.350           | 0.717           | 1.4517         | 0.652            | 0.125            |
| DSSR9  | 5               | 3.2000          | 0.500           | 0.705           | 1.3327         | 0.644            | 0.411            |
| DSSR10 | 3               | 1.2270          | 0.200           | 0.190           | 0.3944         | 0.177            | 0.576            |
| DSSR11 | 2               | 1.9231          | 0.000           | 0.492           | 0.6730         | 0.365            | 0.025 *          |
| DSSR12 | 2               | 1.8824          | 0.150           | 0.481           | 0.6616         | 0.359            | 0.655            |
| DSSR13 | 3               | 2.5723          | 0.150           | 0.627           | 1.0205         | 0.543            | 0.025 *          |
| DSSR14 | 2               | 1.7817          | 0.250           | 0.450           | 0.6306         | 0.342            | 0.025 *          |
| DSSR15 | 3               | 2.6756          | 0.300           | 0.642           | 1.0322         | 0.548            | 0.290            |
| DSSR16 | 5               | 4.7619          | 0.550           | 0.810           | 1.5828         | 0.756            | 0.427            |
| DSSR17 | 2               | 1.9231          | 0.100           | 0.492           | 0.6730         | 0.365            | 0.576            |
| DSSR18 | 1               | 1.0000          | 0.000           | 0.000           | 0.0000         | 0.000            |                  |
| DSSR19 | 1               | 1.0000          | 0.000           | 0.000           | 0.0000         | 0.000            |                  |
| DSSR20 | 1               | 1.0000          | 0.000           | 0.000           | 0.0000         | 0.000            |                  |
| DSSR21 | 1               | 1.0000          | 0.000           | 0.000           | 0.0000         | 0.000            |                  |
| DSSR22 | 1               | 1.0000          | 0.000           | 0.000           | 0.0000         | 0.000            |                  |
| DSSR23 | 2               | 1.5355          | 0.050           | 0.358           | 0.5332         | 0.288            | 0.804            |
| DSSR24 | 2               | 1.2195          | 0.000           | 0.185           | 0.3251         | 0.164            | 0.025 *          |
| DSSR25 | 1               | 1.0000          | 0.000           | 0.000           | 0.0000         | 0.000            |                  |
| DSSR26 | 1               | 1.0000          | 0.000           | 0.000           | 0.0000         | 0.000            |                  |
| DSSR27 | 1               | 1.0000          | 0.000           | 0.000           | 0.0000         | 0.000            |                  |
| DSSR28 | 1               | 1.0000          | 0.000           | 0.000           | 0.0000         | 0.000            |                  |
| DSSR29 | 1               | 1.0000          | 0.000           | 0.000           | 0.0000         | 0.000            |                  |

Table S4. Cont.

| Locus  | Na <sup>1</sup> | Ne <sup>2</sup> | Ho <sup>3</sup> | He <sup>4</sup> | I <sup>5</sup> | PIC <sup>6</sup> | HWE <sup>7</sup> |
|--------|-----------------|-----------------|-----------------|-----------------|----------------|------------------|------------------|
| DSSR30 | 3               | 2.2284          | 0.200           | 0.565           | 0.8909         | 0.461            | 0.442            |
| DSSR31 | 1               | 1.0000          | 0.000           | 0.000           | 0.0000         | 0.000            |                  |
| DSSR32 | 1               | 1.0000          | 0.000           | 0.000           | 0.0000         | 0.000            |                  |
| DSSR33 | 1               | 1.0000          | 0.000           | 0.000           | 0.0000         | 0.000            |                  |
| DSSR34 | 1               | 1.0000          | 0.000           | 0.000           | 0.0000         | 0.000            |                  |
| DSSR35 | 1               | 1.0000          | 0.000           | 0.000           | 0.0000         | 0.000            |                  |
| DSSR36 | 1               | 1.0000          | 0.000           | 0.000           | 0.0000         | 0.000            |                  |
| DSSR37 | 1               | 1.0000          | 0.000           | 0.000           | 0.0000         | 0.000            |                  |
| DSSR38 | 1               | 1.0000          | 0.000           | 0.000           | 0.0000         | 0.000            |                  |
| DSSR39 | 1               | 1.0000          | 0.000           | 0.000           | 0.0000         | 0.000            |                  |
| DSSR40 | 1               | 1.0000          | 0.000           | 0.000           | 0.0000         | 0.000            |                  |
| DSSR41 | 1               | 1.0000          | 0.000           | 0.000           | 0.0000         | 0.000            |                  |
| DSSR42 | 1               | 1.0000          | 0.000           | 0.000           | 0.0000         | 0.000            |                  |
| DSSR43 | 2               | 1.5355          | 0.150           | 0.358           | 0.5332         | 0.288            | 0.576            |
| DSSR44 | 1               | 1.0000          | 0.000           | 0.000           | 0.0000         | 0.000            |                  |
| DSSR45 | 2               | 1.2195          | 0.000           | 0.185           | 0.3251         | 0.164            | 0.025 *          |
| DSSR46 | 1               | 1.0000          | 0.000           | 0.000           | 0.0000         | 0.000            |                  |
| DSSR47 | 1               | 1.0000          | 0.000           | 0.000           | 0.0000         | 0.000            |                  |
| DSSR48 | 1               | 1.0000          | 0.000           | 0.000           | 0.0000         | 0.000            |                  |
| DSSR49 | 1               | 1.0000          | 0.000           | 0.000           | 0.0000         | 0.000            |                  |
| DSSR50 | 1               | 1.0000          | 0.000           | 0.000           | 0.0000         | 0.000            |                  |
| DSSR51 | 1               | 1.0000          | 0.000           | 0.000           | 0.0000         | 0.000            |                  |
| DSSR52 | 2               | 1.3423          | 0.000           | 0.262           | 0.4227         | 0.222            | 0.025 *          |
| DSSR53 | 1               | 1.0000          | 0.000           | 0.000           | 0.0000         | 0.000            |                  |
| DSSR54 | 2               | 1.9802          | 0.300           | 0.508           | 0.6881         | 0.372            | 0.804            |
| DSSR55 | 1               | 1.0000          | 0.000           | 0.000           | 0.0000         | 0.000            |                  |
| DSSR56 | 1               | 1.0000          | 0.000           | 0.000           | 0.0000         | 0.000            |                  |
| DSSR57 | 2               | 1.3423          | 0.100           | 0.262           | 0.4227         | 0.222            | 0.709            |
| DSSR58 | 1               | 1.0000          | 0.000           | 0.000           | 0.0000         | 0.000            |                  |
| DSSR59 | 1               | 1.0000          | 0.000           | 0.000           | 0.0000         | 0.000            |                  |
| DSSR60 | 1               | 1.0000          | 0.000           | 0.000           | 0.0000         | 0.000            |                  |
| DSSR61 | 1               | 1.0000          | 0.000           | 0.000           | 0.0000         | 0.000            |                  |
| DSSR62 | 1               | 1.0000          | 0.000           | 0.000           | 0.0000         | 0.000            |                  |
| DSSR63 | 1               | 1.0000          | 0.000           | 0.000           | 0.0000         | 0.000            |                  |
| DSSR64 | 1               | 1.0000          | 0.000           | 0.000           | 0.0000         | 0.000            |                  |
| DSSR65 | 1               | 1.0000          | 0.000           | 0.000           | 0.0000         | 0.000            |                  |
| DSSR66 | 1               | 1.0000          | 0.000           | 0.000           | 0.0000         | 0.000            |                  |
| DSSR67 | 1               | 1.0000          | 0.000           | 0.000           | 0.0000         | 0.000            |                  |
| DSSR68 | 1               | 1.0000          | 0.000           | 0.000           | 0.0000         | 0.000            |                  |
| DSSR69 | 2               | 1.6000          | 0.000           | 0.385           | 0.5623         | 0.305            |                  |
| DSSR70 | 1               | 1.0000          | 0.000           | 0.000           | 0.0000         | 0.000            |                  |
| DSSR71 | 1               | 1.0000          | 0.000           | 0.000           | 0.0000         | 0.000            |                  |
| DSSR72 | 1               | 1.0000          | 0.000           | 0.000           | 0.0000         | 0.000            |                  |
| DSSR73 | 2               | 1.2195          | 0.000           | 0.185           | 0.3251         | 0.164            | 0.025 *          |
| DSSR74 | 1               | 1.0000          | 0.000           | 0.000           | 0.0000         | 0.000            |                  |
| DSSR75 | 1               | 1.0000          | 0.000           | 0.000           | 0.0000         | 0.000            |                  |
| DSSR76 | 1               | 1.0000          | 0.000           | 0.000           | 0.0000         | 0.000            |                  |
| DSSR77 | 1               | 1.0000          | 0.000           | 0.000           | 0.0000         | 0.000            |                  |
| DSSR78 | 1               | 1.0000          | 0.000           | 0.000           | 0.0000         | 0.000            |                  |
| DSSR79 | 1               | 1.0000          | 0.000           | 0.000           | 0.0000         | 0.000            |                  |

Table S4. Cont.

| Locus  | Na <sup>1</sup> | Ne <sup>2</sup> | Ho <sup>3</sup> | He <sup>4</sup> | I <sup>5</sup> | PIC <sup>6</sup> | HWE <sup>7</sup> |
|--------|-----------------|-----------------|-----------------|-----------------|----------------|------------------|------------------|
| DSSR80 | 1               | 1.0000          | 0.000           | 0.000           | 0.0000         | 0.000            |                  |
| DSSR81 | 2               | 1.7241          | 0.200           | 0.431           | 0.6109         | 0.332            | 0.025 *          |
| DSSR82 | 1               | 1.0000          | 0.000           | 0.000           | 0.0000         | 0.000            |                  |
| DSSR83 | 2               | 1.1611          | 0.050           | 0.142           | 0.2664         | 0.129            | 0.241            |
| DSSR84 | 1               | 1.0000          | 0.000           | 0.000           | 0.0000         | 0.000            |                  |
| DSSR85 | 1               | 1.0000          | 0.000           | 0.000           | 0.0000         | 0.000            |                  |
| DSSR86 | 2               | 1.7241          | 0.000           | 0.431           | 0.6109         | 0.332            | 0.025 *          |
| DSSR87 | 1               | 1.0000          | 0.000           | 0.000           | 0.0000         | 0.000            |                  |
| DSSR88 | 3               | 1.8307          | 0.400           | 0.465           | 0.7187         | 0.371            | 0.484            |
| DSSR89 | 1               | 1.0000          | 0.000           | 0.000           | 0.0000         | 0.000            |                  |
| DSSR90 | 1               | 1.0000          | 0.000           | 0.000           | 0.0000         | 0.000            |                  |
| DSSR91 | 1               | 1.0000          | 0.000           | 0.000           | 0.0000         | 0.000            |                  |
| DSSR92 | 2               | 1.2800          | 0.150           | 0.224           | 0.3768         | 0.195            | 0.241            |
| DSSR93 | 2               | 1.9560          | 0.450           | 0.501           | 0.6819         | 0.369            | 0.804            |
| DSSR94 | 1               | 1.0000          | 0.000           | 0.000           | 0.0000         | 0.000            |                  |
| DSSR95 | 2               | 1.8349          | 0.400           | 0.467           | 0.6474         | 0.351            | 0.655            |
| DSSR96 | 2               | 1.1611          | 0.050           | 0.142           | 0.2664         | 0.129            | 0.241            |
| DSSR97 | 2               | 1.7241          | 0.000           | 0.431           | 0.6109         | 0.332            | 0.025 *          |

<sup>1</sup> number of alleles; <sup>2</sup> The number of effective number of alleles; <sup>3</sup> observed heterozygosity; <sup>4</sup> expected heterozygosity; <sup>5</sup> Shannon's Information Index; <sup>6</sup> Polymorphism information content; <sup>7</sup> Hardy–Weinberg equilibrium, the probabilities of deviation from Hardy–Weinbergequilibrium (HWE) are indicated by asterisks (\*  $p < 0.05$ ).
